# Supplementary material
Source: PubMed Central journal article supplement (PMC4135724)
Supplement: NIHMS578566-supplement-supplement_1.pdf [file NIHMS578566-supplement-supplement_1.pdf]

Type of file: figure

Label: ED Fig1

Filename: ED Fig1.pdf

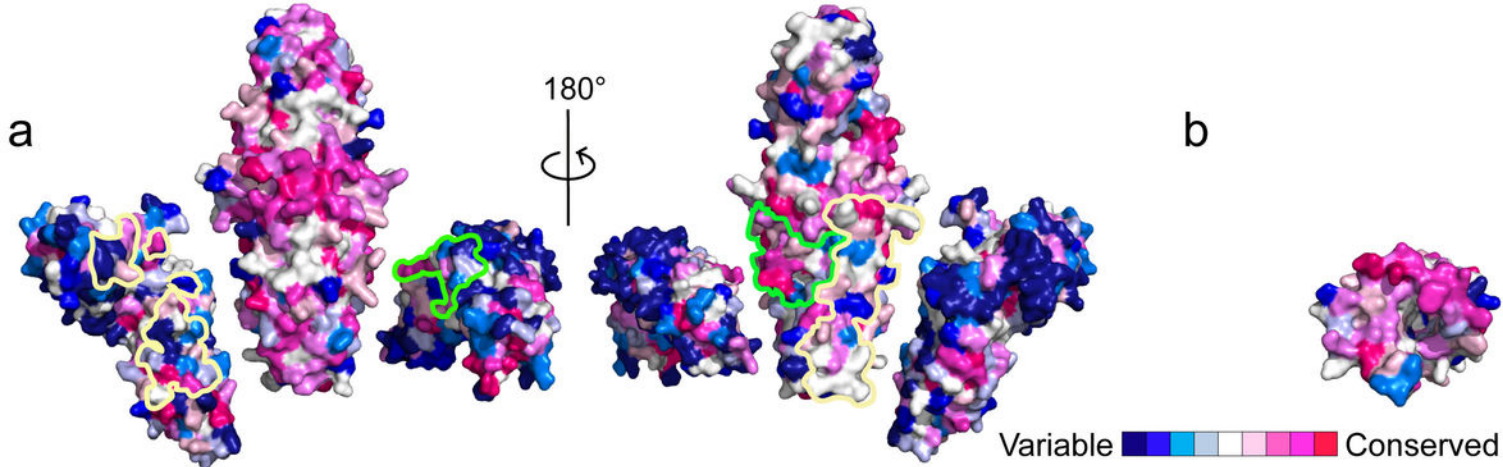

**c**

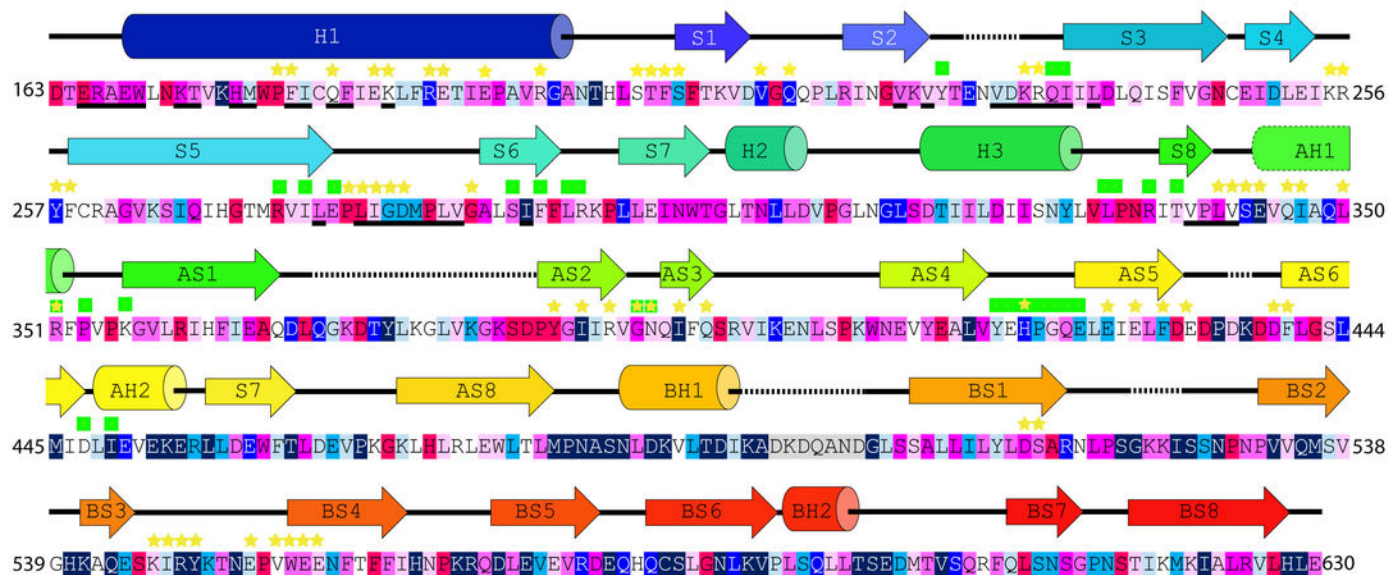

Type of file: figure

Label: ED Fig2

Filename: ED Fig2.pdf

**a**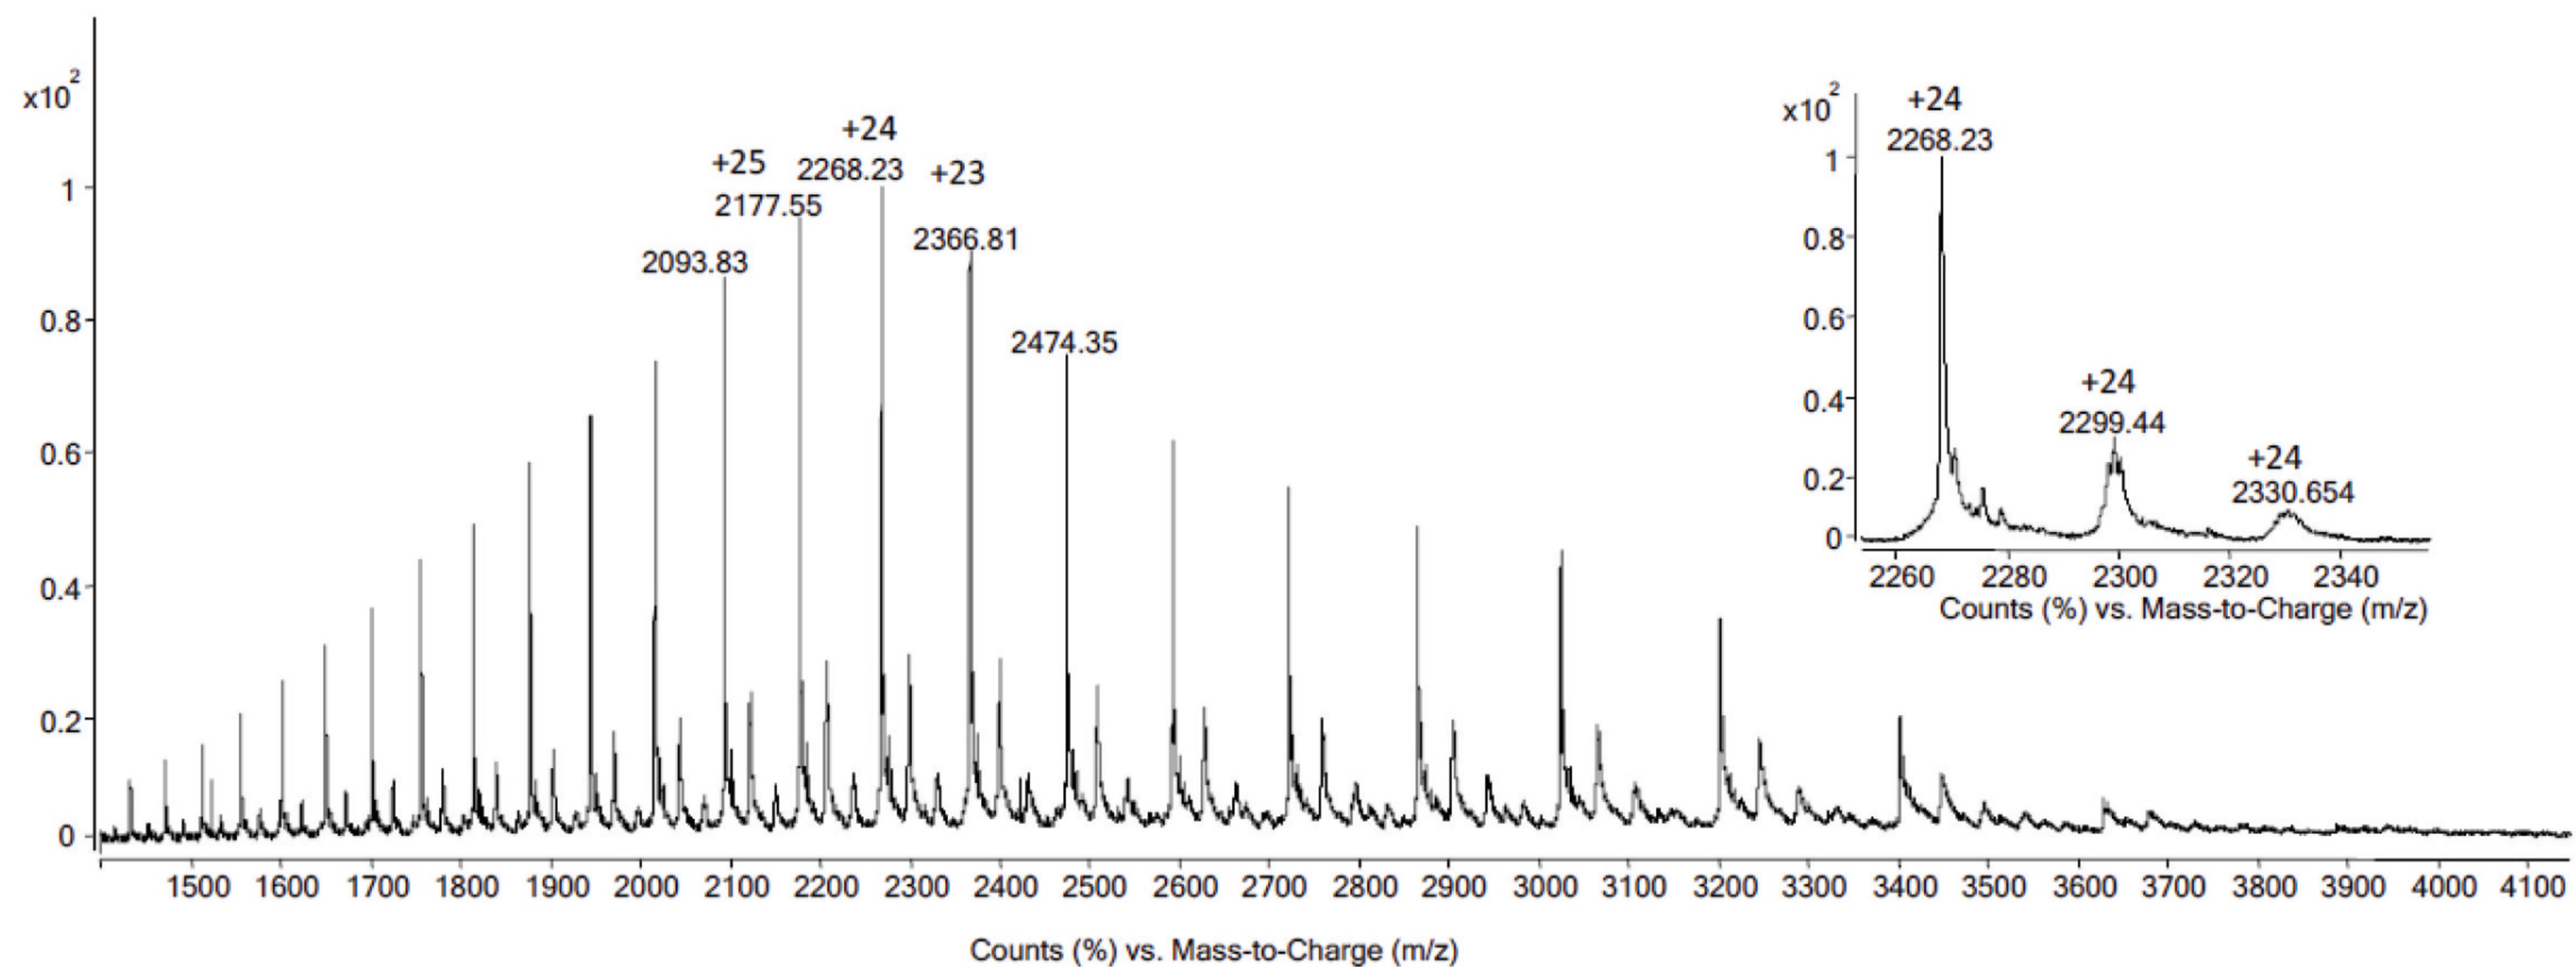**b**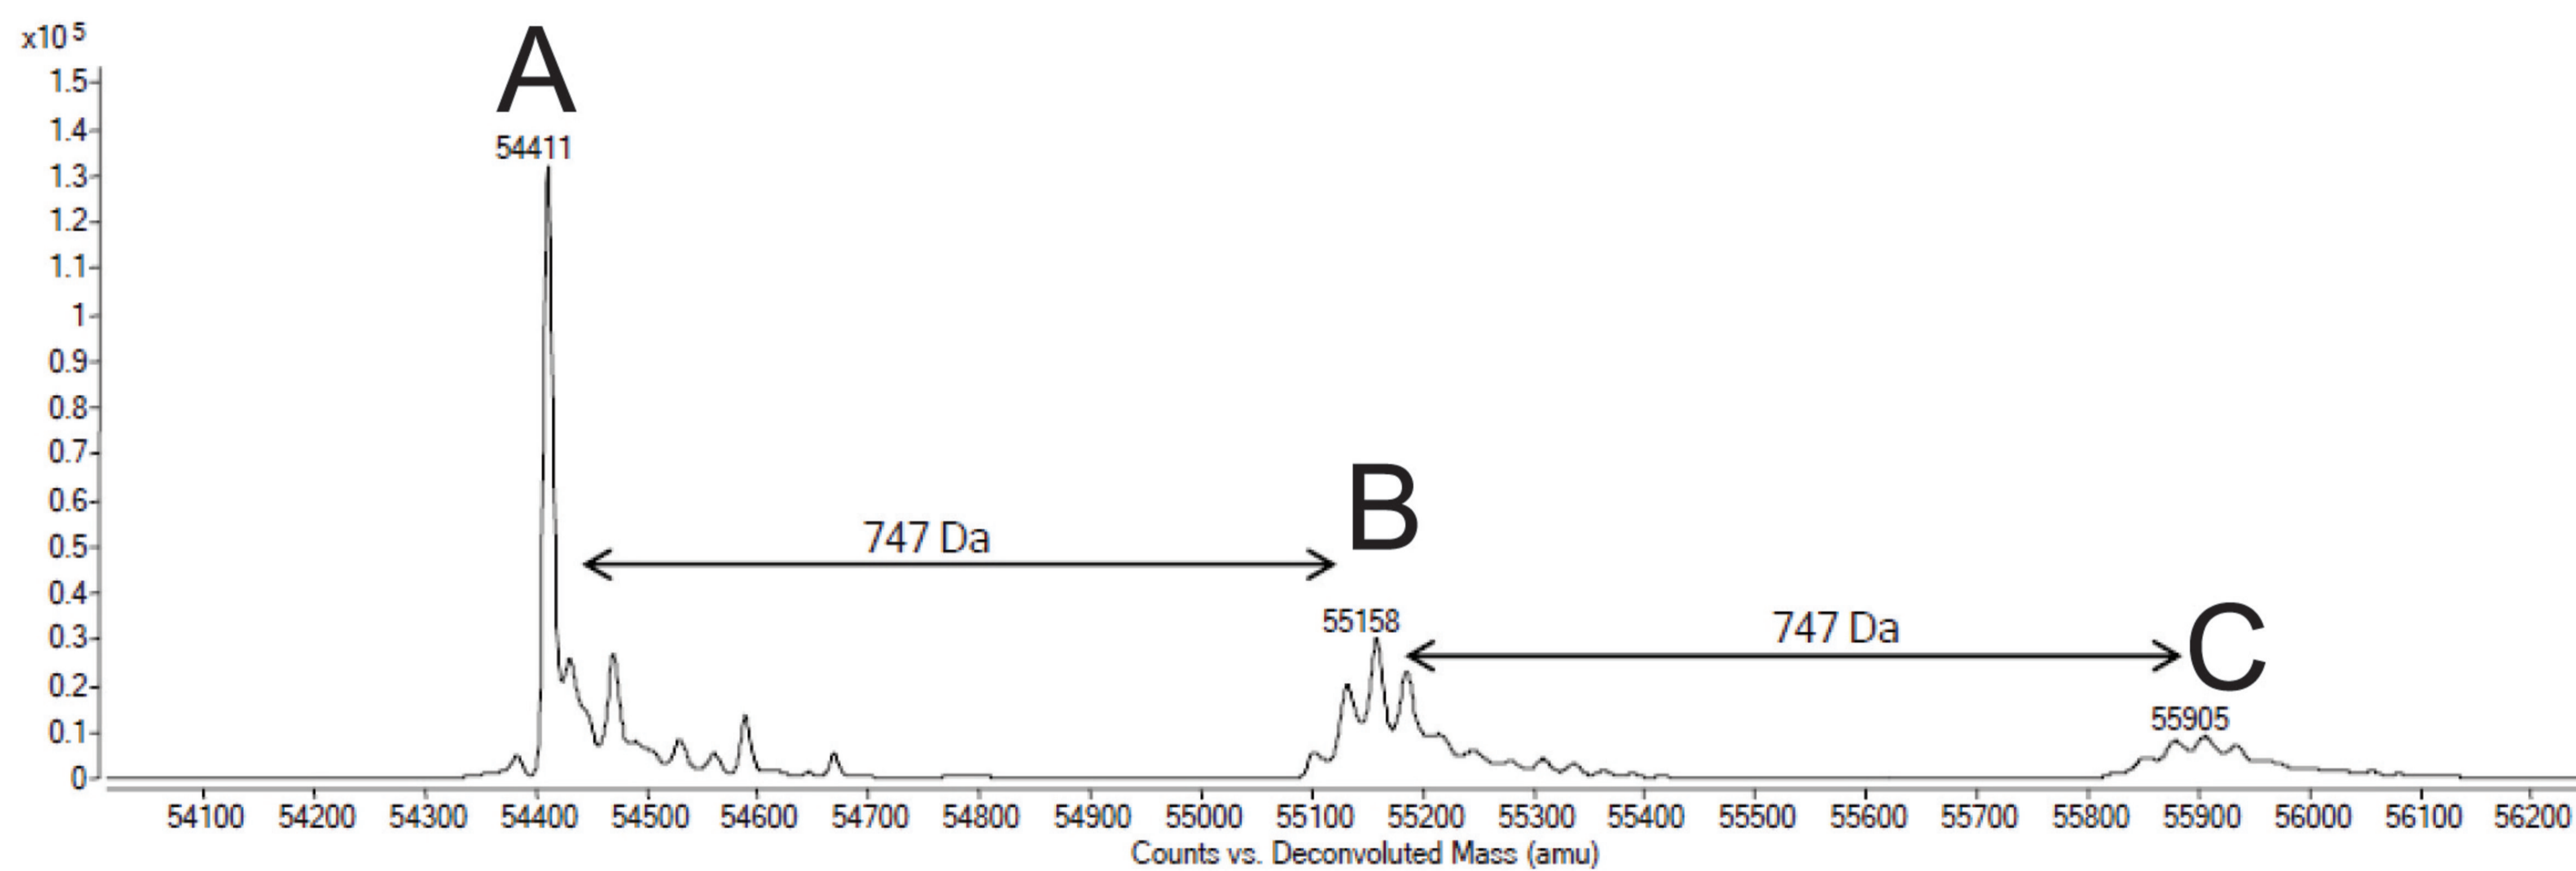**c**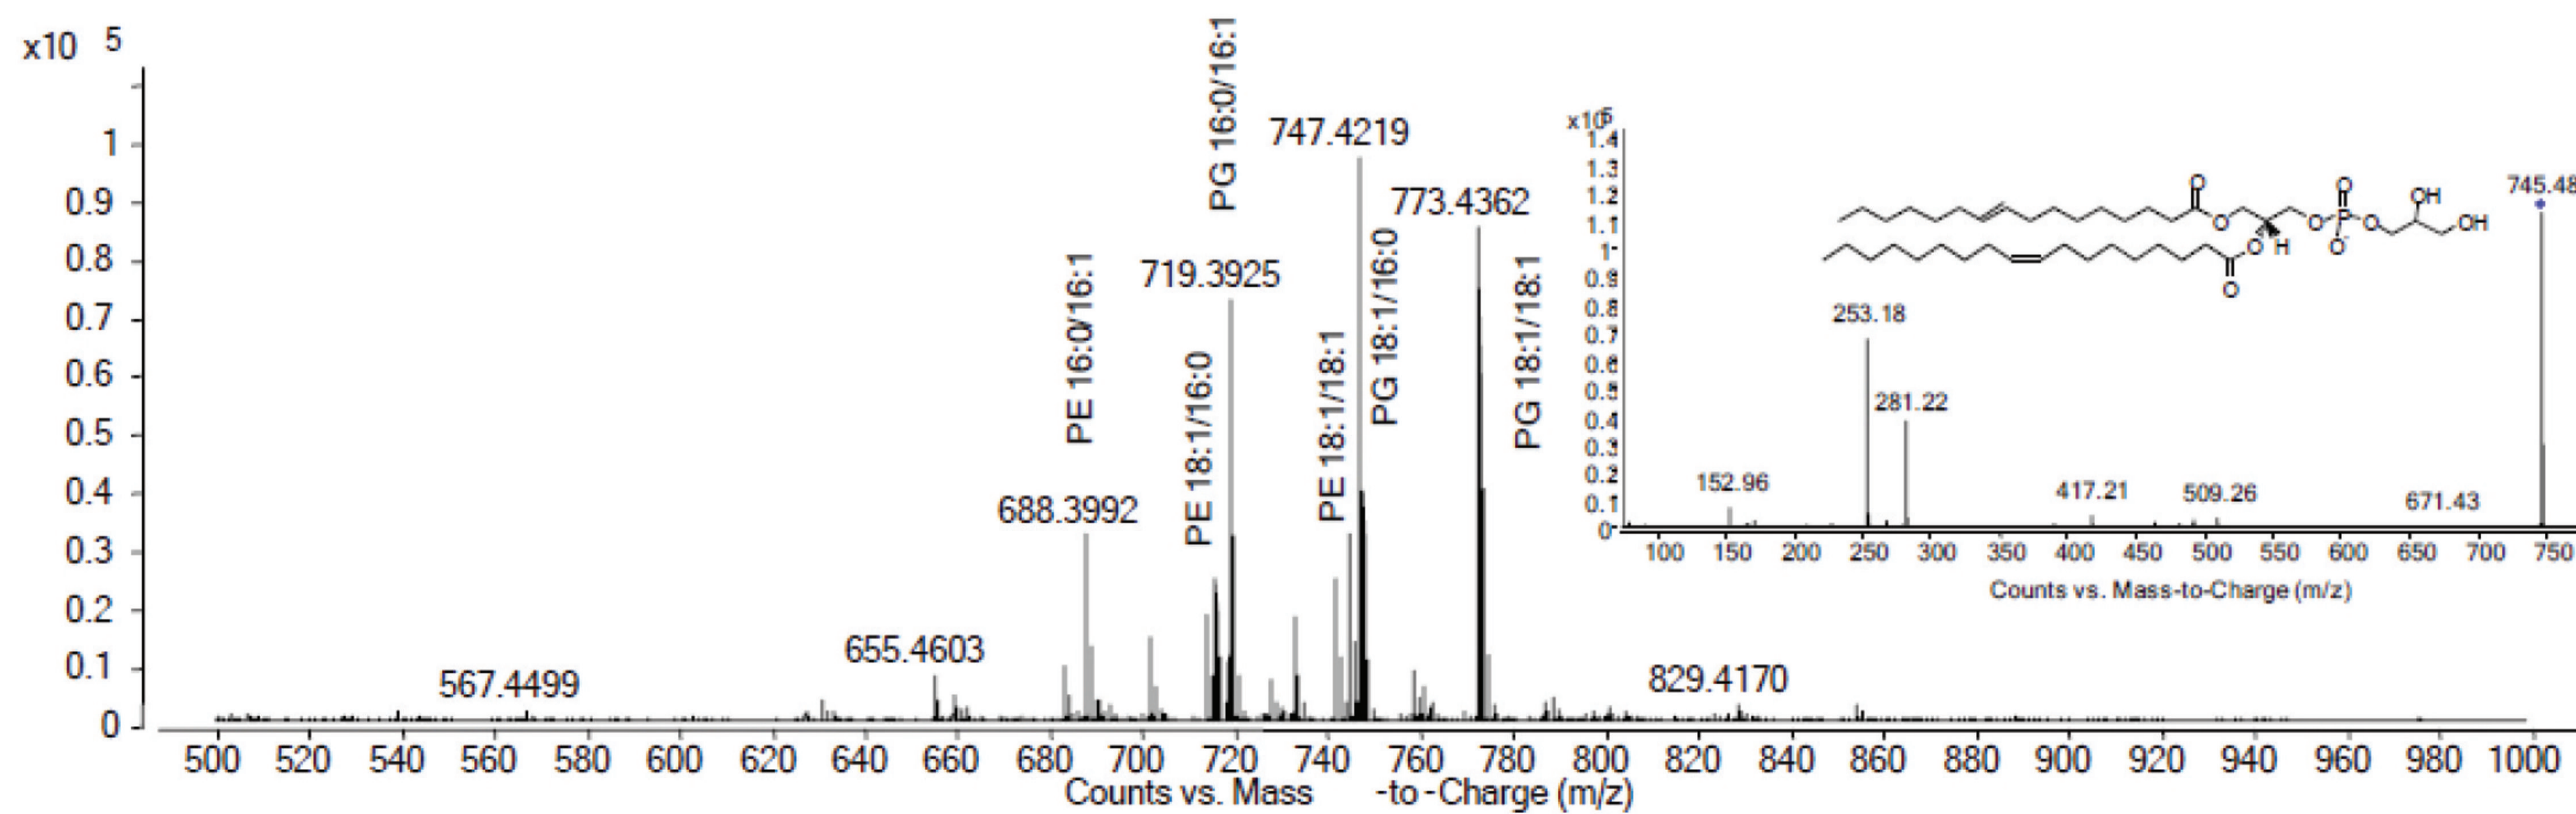

Type of file: figure

Label: ED Fig3

Filename: ED Fig3.pdf

**a**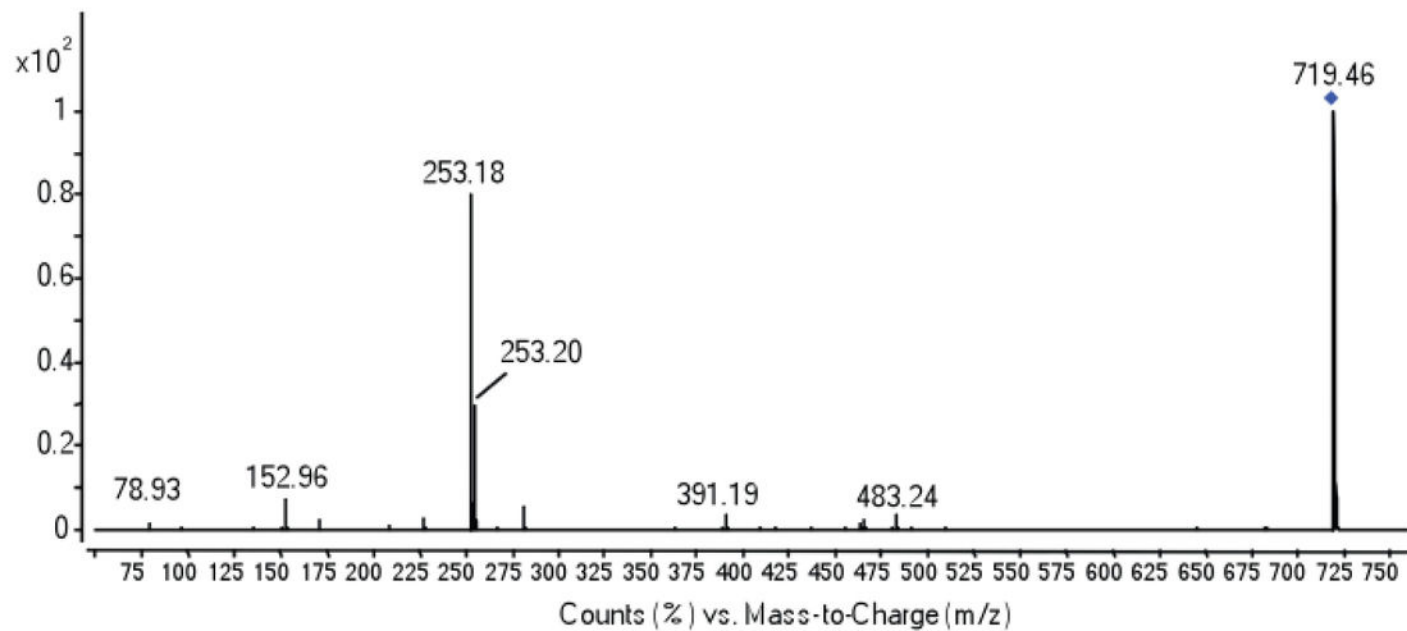**b**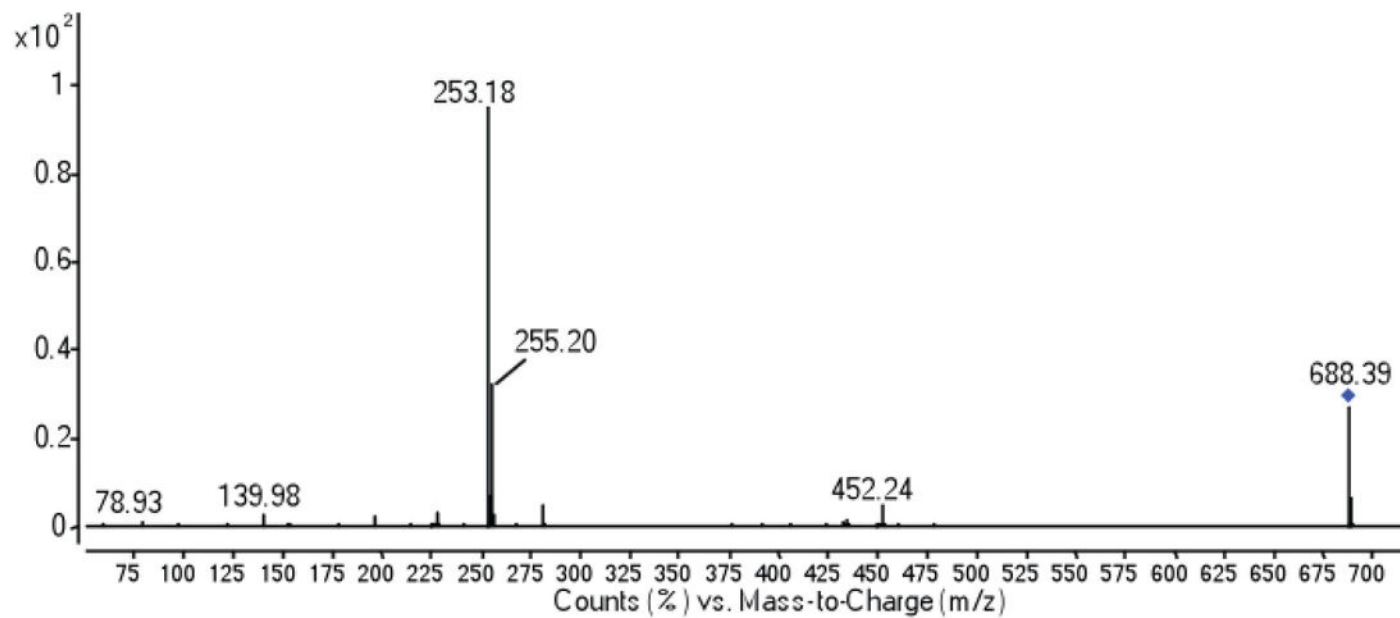

Type of file: figure

Label: ED Fig4

Filename: ED Fig4.pdf

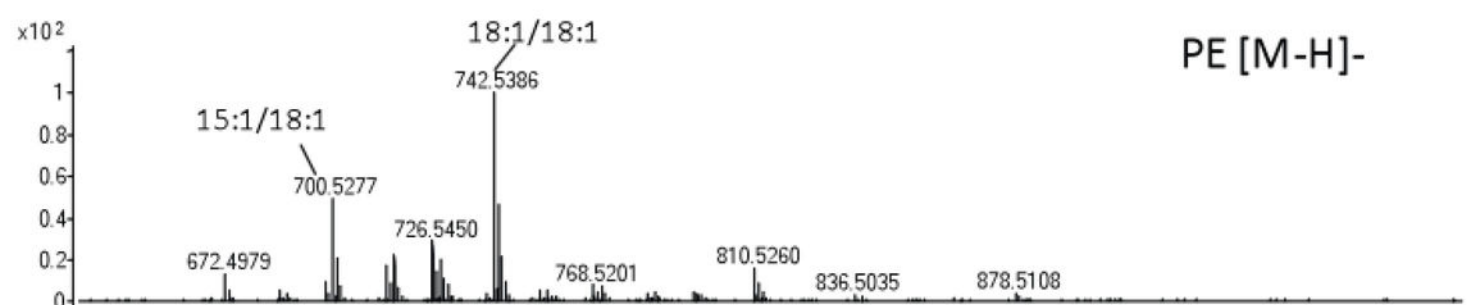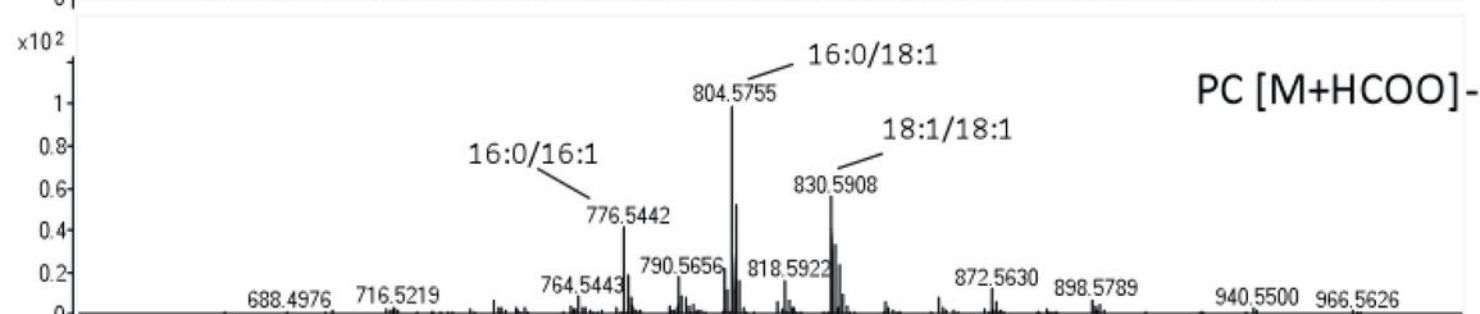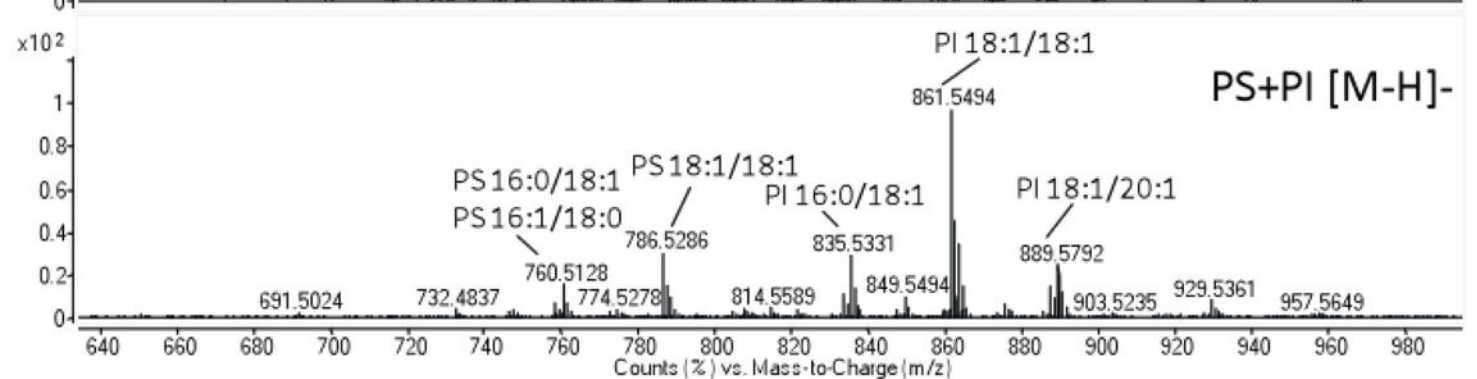



Type of file: figure

Label: ED Fig5

Filename: ED Fig5.pdf

a

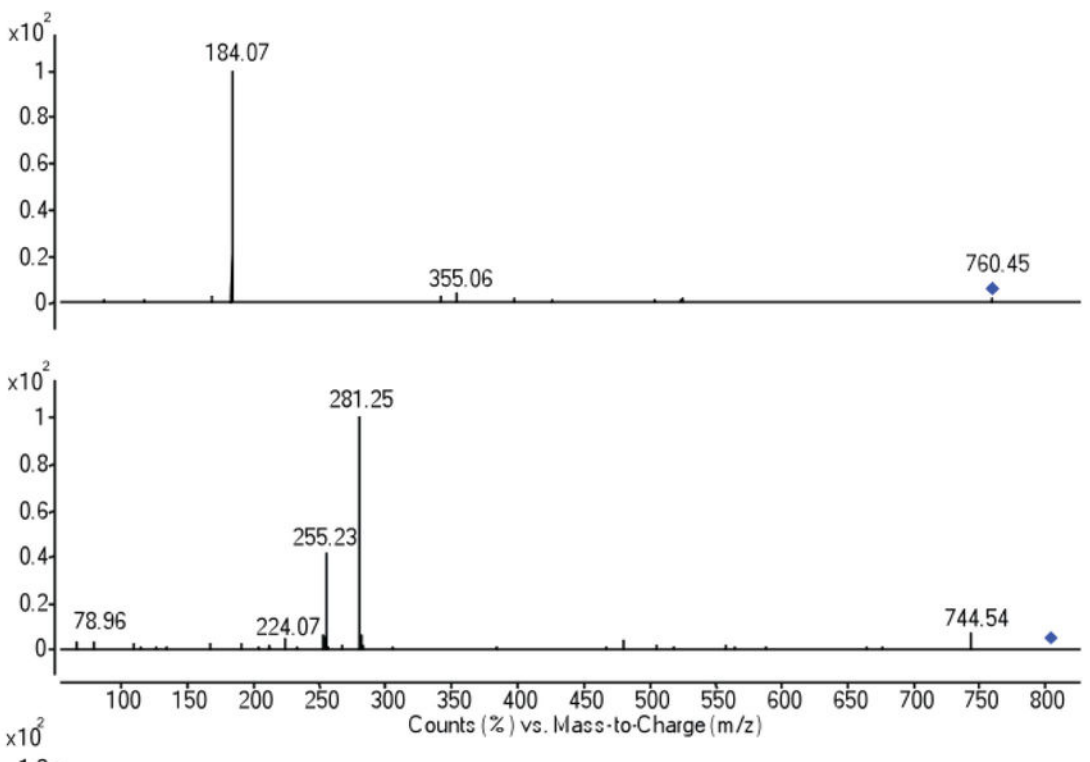

b

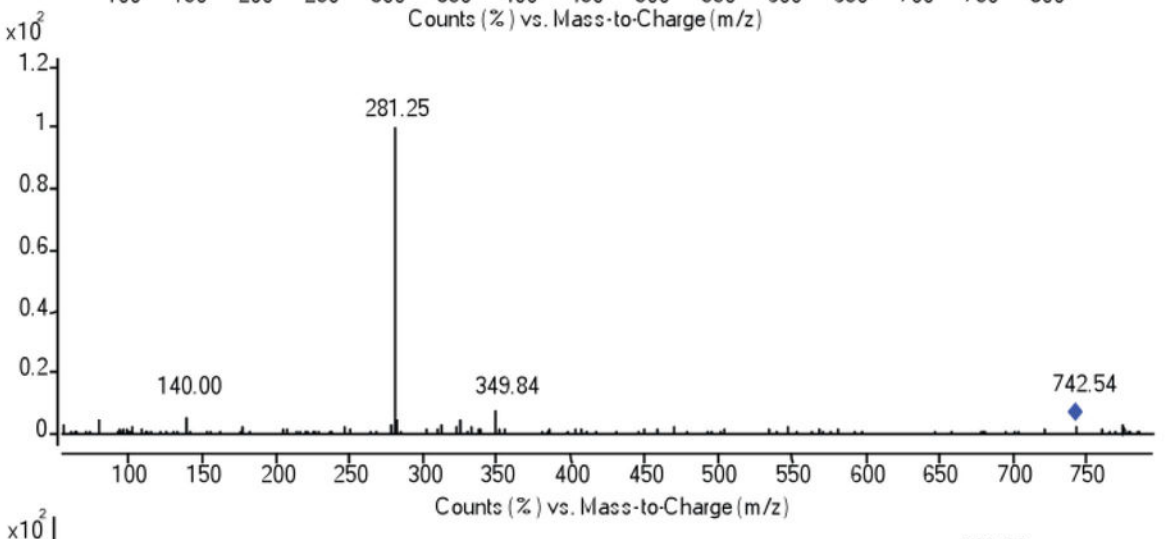

c

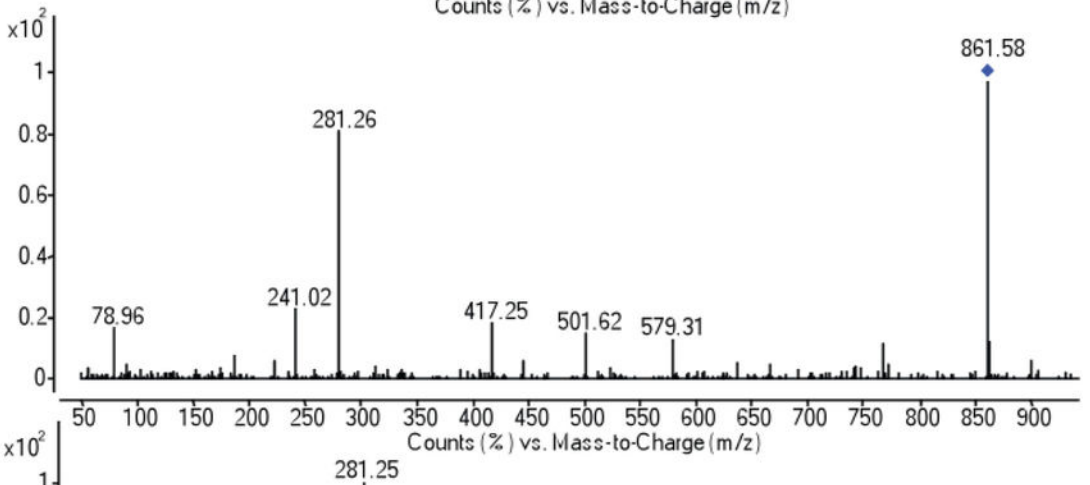

d

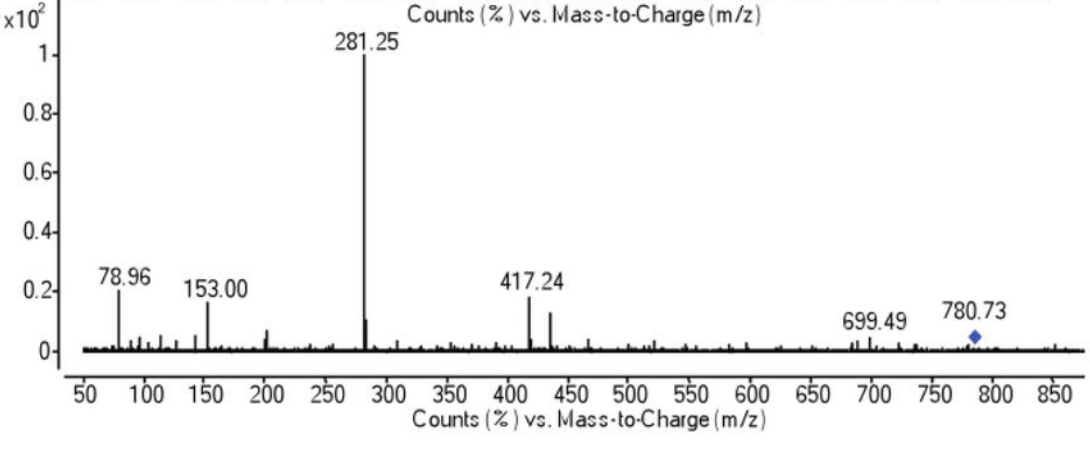

Type of file: figure

Label: ED Fig6

Filename: ED Fig6.pdf

a

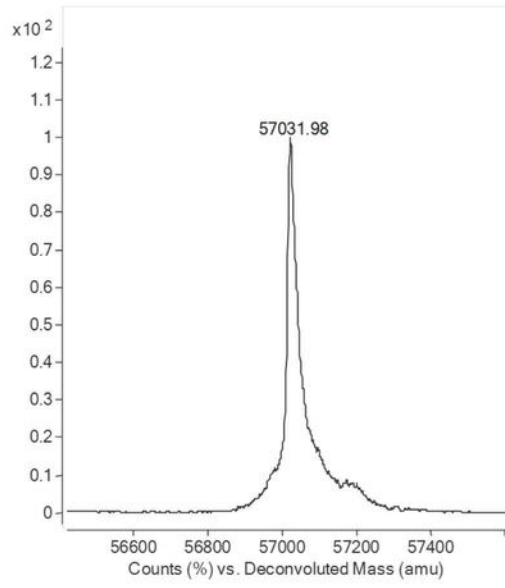

b

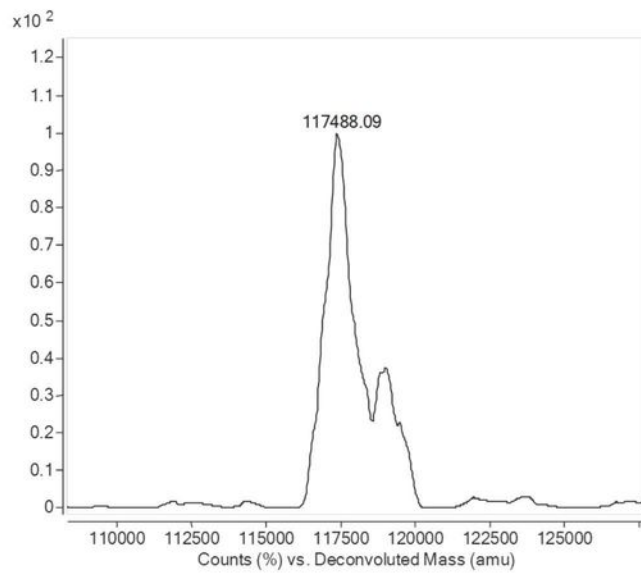

c

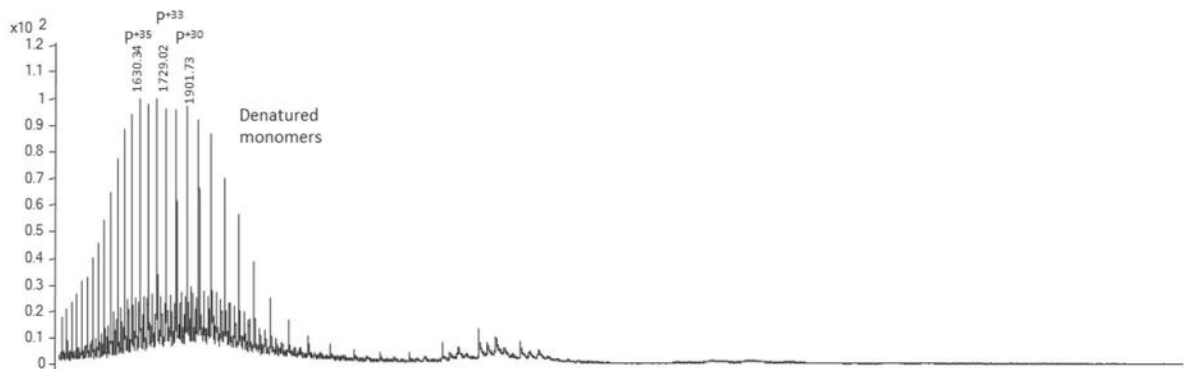

Type of file: figure

Label: ED Fig7

Filename: ED Fig7.pdf

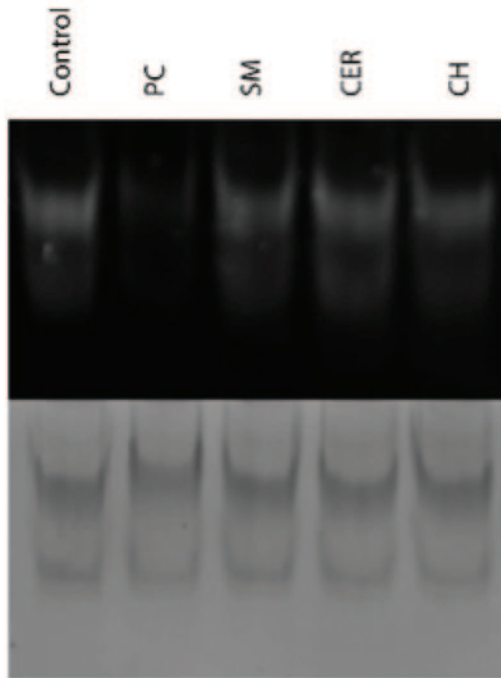

| n=5   | PC       | SM       | CER      | CH       |
|-------|----------|----------|----------|----------|
| Mean  | 0.71249  | 0.052743 | -0.00708 | 0.143559 |
| STDEV | 0.046558 | 0.049667 | 0.086397 | 0.135668 |

Type of file: figure

Label: ED Table1

Filename: ED Table1.pdf

| <b>Data collection</b>                                  |                                               | E-Syt2(163-634)                               |                      |
|---------------------------------------------------------|-----------------------------------------------|-----------------------------------------------|----------------------|
| Crystal                                                 | Native                                        | SeMet, Iodide                                 |                      |
| Space group                                             | P2 <sub>1</sub> 2 <sub>1</sub> 2 <sub>1</sub> | P2 <sub>1</sub> 2 <sub>1</sub> 2 <sub>1</sub> |                      |
| Unit cell dimensions                                    |                                               |                                               |                      |
| <i>a, b, c</i> (Å)                                      | 74.33, 88.38, 167.19                          | 73.54, 88.33, 166.24                          | 73.39, 88.17, 165.87 |
|                                                         |                                               | Peak                                          | Remote               |
| Wavelength (Å)                                          | 0.9792                                        | 0.9792                                        | 1.9074               |
| Resolution (Å)                                          | 47.14–2.44 (2.57-2.44)                        | 46.94–2.8 (2.95-2.8)                          | 46.84-2.8 (2.95-2.8) |
| <i>R</i> <sub>merge</sub> (%)                           | 8.9 (60.5)                                    | 10.8 (62.9)                                   | 6.7(36.9)            |
| <i>I</i> / $\sigma$                                     | 13.6 (2.4)                                    | 14.1(2.5)                                     | 20.8(4.3)            |
| Completeness (%)                                        | 99.9 (99.8)                                   | 99.9(99.8)                                    | 99.6(99.4)           |
| Redundancy                                              | 6.3 (6.4)                                     | 6.4(5.9)                                      | 6.2(6.1)             |
| <b>Refinement</b>                                       |                                               |                                               |                      |
| Resolution (Å)                                          | 47.14–2.44                                    |                                               |                      |
| No. unique reflections                                  | 41769                                         |                                               |                      |
| <i>R</i> <sub>work</sub> / <i>R</i> <sub>free</sub> (%) | 21.02/25.56                                   |                                               |                      |
| No. atoms                                               |                                               |                                               |                      |
| Protein                                                 | 7143                                          |                                               |                      |
| Water                                                   | 212                                           |                                               |                      |
| Ligand                                                  | 138                                           |                                               |                      |
| Average B (Å <sup>2</sup> )                             |                                               |                                               |                      |
| Protein                                                 | 50.79                                         |                                               |                      |
| Water                                                   | 45.54                                         |                                               |                      |
| Ligand                                                  | 53.59                                         |                                               |                      |
| R.m.s deviations                                        |                                               |                                               |                      |
| Bond lengths (Å)                                        | 0.003                                         |                                               |                      |
| Bond angles (°)                                         | 0.846                                         |                                               |                      |

Numbers in parenthesis refer to values in highest resolution bin.



Type of file: figure

Label: ED Table2

Filename: ED Table2.pdf

| <b>[M-H]<sup>-</sup></b> | <b>lipid species</b>                             |
|--------------------------|--------------------------------------------------|
| 660                      | PE 14:0/16:1                                     |
| 662                      | PE 14:0/16:0                                     |
| 686                      | PE 16:1/16:1                                     |
| <b>688</b>               | <b>PE 16:0/16:1</b>                              |
| 691                      | PG 14:0/16:1                                     |
| 693                      | PG 16:0/14:0                                     |
| 702                      | PE 16:0/cy17:0                                   |
| 714                      | PE 18:1/16:1<br>PE cy17:0/cy17:0                 |
| <b>716</b>               | <b>PE 16:0/18:1</b>                              |
| <b>719</b>               | <b>PG 16:0/16:1</b><br><b>PG 14:0/18:1</b>       |
| 728                      | PE 18:1/cy17:0                                   |
| 730                      | PE 16:0/cy19:0<br>PE 18:0/cy17:0<br>PE 17:0/18:1 |
| 733                      | PG 16:0/cy17:0                                   |
| 742                      | PE 18:1/18:1<br>PE cy19:0/cy17:0                 |
| <b>745</b>               | <b>PG 18:1/16:1</b>                              |
| <b>747</b>               | <b>PG 16:0/18:1</b>                              |
| 759                      | PG 18:1/cy17:0                                   |
| <b>773</b>               | <b>PG 18:1/18:1</b>                              |

Type of file: figure

Label: ED Table3

Filename: ED Table3.pdf

|      | ng/4μg of protein |        |       |      |       |      |
|------|-------------------|--------|-------|------|-------|------|
|      | Cer               | PC     | PE    | PG   | PI    | PS   |
| Mean | 1.71              | 145.97 | 44.68 | 0.3  | 15.64 | 4.92 |
| SD   | 0.02              | 3.3    | 0     | 0.01 | 4.39  | 0.24 |
